# Supplementary material
Source: PubMed Central journal article supplement (PMC10549984)
Supplement: ehp12110.s001.acco.pdf [file ehp12110.s001.acco.pdf]

**Note to readers with disabilities:** *EHP* strives to ensure that all journal content is accessible to all readers. However, some figures and Supplemental Material published in *EHP* articles may not conform to [508 standards](#) due to the complexity of the information being presented. If you need assistance accessing journal content, please contact [ehp508@niehs.nih.gov](mailto:ehp508@niehs.nih.gov). Our staff will work with you to assess and meet your accessibility needs within 3 working days.

### **Supplemental Material**

#### **Exposure to Particulate Matter Air Pollution and Age of Menarche in a Nationwide Cohort of U.S. Girls**

Robert B. Hood, Jaime E. Hart, Francine Laden, Bernard Rosner, Jorge E. Chavarro, and Audrey J. Gaskins

#### **Table of Contents**

**Table S1.** Pearson correlations between particulate matter (PM) exposures among 5,201 girls in the Growing Up Today Study from 1989 to 2008.

**Table S2.** Hazard ratios (HRs) and 95% confidence intervals (CIs) for the associations between residential ambient PM<sub>10</sub>, PM<sub>2.5-10</sub>, and PM<sub>2.5</sub> exposures and age at menarche using Cox proportional hazard models in the Growing Up Today Study 2, 1988–2008 (n = 5,201).

**Table S3.** Hazard ratios (HRs) and 95% confidence intervals (Cis) for the association between residential ambient PM<sub>2.5</sub> exposure and age at menarche using restricted cubic splines in the Growing Up Today Study 2, 1988-2008 (n=5,201).

**Table S4.** Predicted survival time for girls in the Growing Up Today Study 2 (n=5,201) exposed to the 10<sup>th</sup> and 90<sup>th</sup> percentile for the cumulative average PM exposure from 1988 to 2008 using Cox proportional hazard model.

**Table S5.** Predicted survival time for girls in the Growing Up Today Study 2 (n=4,906) exposed to the 10<sup>th</sup> and 90<sup>th</sup> percentile for the in utero PM average from 1988 to 2008 using Cox proportional hazard model.

**Table S6.** Predicted survival time for girls in the Growing Up Today Study 2 (n=5,201) exposed to the 10<sup>th</sup> and 90<sup>th</sup> percentile for the 1-year PM average from 1988 to 2008 using Cox proportional hazard model.

**Table S7.** Predicted survival time for girls in the Growing Up Today Study 2 (n=5,201) exposed to the 10<sup>th</sup> and 90<sup>th</sup> percentile for the 2-year PM average from 1988 to 2008 using Cox proportional hazard model.

**Table S8.** Hazard ratios (HRs) and 95% confidence intervals (CIs) for the associations between residential PM<sub>10</sub>, PM<sub>2.5-10</sub>, and PM<sub>2.5</sub> exposures and age at menarche using Cox proportional hazard models in the Growing Up Today Study 2, 1988–2008 who did not move during the study period (n = 1827).

**Table S9.** Hazard ratios (HRs) and 95% confidence intervals (CIs) for the associations between residential PM<sub>2.5-10</sub>, and PM<sub>2.5</sub> exposures and age at menarche using Cox proportional hazard models in the Growing Up Today Study 2, 1988–2008 (n = 5,201) using multipollutant models.

**Table S10.** Hazard ratios (HRs) and 95% confidence intervals (CIs) for the associations between 1-year average residential PM<sub>10</sub>, PM<sub>2.5-10</sub>, and PM<sub>2.5</sub> exposures and age at menarche in the Growing Up Today Study 2, 1988–1995 (n = 5,201) further adjusting for cumulative average exposures.

**Figure S1.** Overview of exclusion criteria applied to the Growing Up Today Study 2 participants from 1988 to 2008.

**Figure S2.** Restricted cubic spline models to test the non-linear association between PM<sub>2.5</sub> and age at menarche in the Growing Up Today Study 2, 1988–2008 (n=5,201) (see Table S3).

**Figure S3.** Predicted survival time for girls in the Growing Up Today Study 2 (n=5,201) exposed to the 10<sup>th</sup> and 90<sup>th</sup> percentile for the in utero PM average from 1988 to 2008 using Cox proportional hazard model (see Table S5).

**Figure S4.** Predicted survival time for girls in the Growing Up Today Study 2 (n=5,201) exposed to the 10<sup>th</sup> and 90<sup>th</sup> percentile for the 1-year PM average from 1988 to 2008 using Cox proportional hazard model (see Table S6).

**Figure S5.** Predicted survival time for girls in the Growing Up Today Study 2 (n=5,201) exposed to the 10<sup>th</sup> and 90<sup>th</sup> percentile for the 2-year PM average from 1988 to 2008 using Cox proportional hazard model (see Table S7).

**Table S1.** Pearson correlations between particulate matter (PM) exposures among 5,201 girls in the Growing Up Today Study from 1989 to 2008.

| Exposure ( $\mu\text{g}/\text{m}^3$ ) | Median (IQR) | Mean (Min, Max)               | PM <sub>2.5</sub>     |        |        |            | PM <sub>2.5-10</sub>  |        |        |            | PM <sub>10</sub>      |        |        |            |
|---------------------------------------|--------------|-------------------------------|-----------------------|--------|--------|------------|-----------------------|--------|--------|------------|-----------------------|--------|--------|------------|
|                                       |              |                               | In utero <sup>a</sup> | 1-year | 2-year | Cumulative | In utero <sup>a</sup> | 1-year | 2-year | Cumulative | In utero <sup>a</sup> | 1-year | 2-year | Cumulative |
| <b>PM<sub>2.5</sub></b>               |              |                               |                       |        |        |            |                       |        |        |            |                       |        |        |            |
| In utero <sup>a</sup>                 | 16.0 (4.6)   | 16.1 (4.8, 32.2)              | ---                   | 0.69   | 0.71   | 0.84       | 0.32                  | 0.21   | 0.22   | 0.27       | 0.71                  | 0.49   | 0.50   | 0.61       |
| 1-year                                | 13.6 (4.2)   | 13.7 (2.3, 32.6)              | ---                   | ---    | 0.98   | 0.92       | 0.20                  | 0.36   | 0.35   | 0.32       | 0.47                  | 0.75   | 0.73   | 0.67       |
| 2-year                                | 13.7 (4.2)   | 13.8 (2.5, 32.2)              | ---                   | ---    | ---    | 0.93       | 0.20                  | 0.35   | 0.36   | 0.32       | 0.48                  | 0.73   | 0.74   | 0.68       |
| Cumulative                            | 14.2 (4.0)   | 14.3 (4.0, 31.5)              | ---                   | ---    | ---    | ---        | 0.25                  | 0.31   | 0.32   | 0.34       | 0.58                  | 0.67   | 0.69   | 0.73       |
| <b>PM<sub>2.5-10</sub></b>            |              |                               |                       |        |        |            |                       |        |        |            |                       |        |        |            |
| In utero <sup>a</sup>                 | 10.5 (5.9)   | 11.6 (1.8, 51.1)              | ---                   | ---    | ---    | ---        | ---                   | 0.78   | 0.80   | 0.89       | 0.89                  | 0.65   | 0.67   | 0.77       |
| 1-year                                | 7.9 (5.4)    | 8.8 (-0.3, 51.1) <sup>b</sup> | ---                   | ---    | ---    | ---        | ---                   | ---    | 0.99   | 0.94       | 0.68                  | 0.89   | 0.88   | 0.84       |
| 2-year                                | 8.0 (5.3)    | 8.9 (0.4, 51.1)               | ---                   | ---    | ---    | ---        | ---                   | ---    | ---    | 0.95       | 0.70                  | 0.88   | 0.89   | 0.85       |
| Cumulative                            | 8.6 (5.0)    | 9.6 (1.6, 47.5)               | ---                   | ---    | ---    | ---        | ---                   | ---    | ---    | ---        | 0.79                  | 0.82   | 0.84   | 0.89       |
| <b>PM<sub>10</sub></b>                |              |                               |                       |        |        |            |                       |        |        |            |                       |        |        |            |
| In utero <sup>a</sup>                 | 26.7 (7.8)   | 27.7 (8.8, 83.3)              | ---                   | ---    | ---    | ---        | ---                   | ---    | ---    | ---        | ---                   | 0.71   | 0.73   | 0.86       |
| 1-year                                | 21.6 (7.3)   | 22.5 (5.6, 83.3)              | ---                   | ---    | ---    | ---        | ---                   | ---    | ---    | ---        | ---                   | ---    | 0.99   | 0.93       |
| 2-year                                | 21.9 (7.2)   | 22.7 (5.7, 83.3)              | ---                   | ---    | ---    | ---        | ---                   | ---    | ---    | ---        | ---                   | ---    | ---    | 0.94       |
| Cumulative                            | 23.1 (6.6)   | 23.8 (8.2, 78.7)              | ---                   | ---    | ---    | ---        | ---                   | ---    | ---    | ---        | ---                   | ---    | ---    | ---        |

<sup>a</sup> Correlations for in utero PM exposure were only among a subset of 4906 girls with this available data.

<sup>b</sup> PM<sub>2.5-10</sub> is calculated by subtracting estimated ambient PM<sub>2.5</sub> exposure from estimated ambient PM<sub>10</sub>. In rare instances, where PM<sub>2.5</sub> exposure was predicted to be larger than PM<sub>10</sub>, this subtraction resulted in negative values for PM<sub>2.5-10</sub>.

**Table S2.** Hazard ratios (HRs) and 95% confidence intervals (CIs) for the associations between residential ambient PM<sub>10</sub>, PM<sub>2.5-10</sub>, and PM<sub>2.5</sub> exposures and age at menarche using Cox proportional hazard models in the Growing Up Today Study 2, 1988–2008 (n = 5,201).

|                                                           | HR (95% CI) <sup>a</sup> |                      |                      |
|-----------------------------------------------------------|--------------------------|----------------------|----------------------|
|                                                           | Unadjusted               | Model 1 <sup>b</sup> | Model 2 <sup>c</sup> |
| <b>In utero exposure, per IQR<sup>d,e</sup></b>           |                          |                      |                      |
| PM <sub>10</sub>                                          | 1.04 (1.01, 1.06)        | 1.06 (1.04, 1.09)    | 1.02 (1.00, 1.05)    |
| PM <sub>2.5-10</sub>                                      | 1.02 (0.99, 1.04)        | 1.04 (1.01, 1.07)    | 1.01 (0.98, 1.04)    |
| PM <sub>2.5</sub>                                         | 1.08 (1.05, 1.11)        | 1.08 (1.05, 1.11)    | 1.03 (1.00, 1.06)    |
| <b>1-year average exposure, per IQR<sup>d,f</sup></b>     |                          |                      |                      |
| PM <sub>10</sub>                                          | 1.03 (1.00, 1.06)        | 1.05 (1.01, 1.09)    | 1.02 (0.99, 1.06)    |
| PM <sub>2.5-10</sub>                                      | 0.99 (0.96, 1.02)        | 1.00 (0.97, 1.04)    | 0.99 (0.96, 1.03)    |
| PM <sub>2.5</sub>                                         | 1.09 (1.05, 1.13)        | 1.09 (1.05, 1.14)    | 1.06 (1.02, 1.10)    |
| <b>2-year average exposure, per IQR<sup>d,f</sup></b>     |                          |                      |                      |
| PM <sub>10</sub>                                          | 1.04 (1.00, 1.07)        | 1.06 (1.02, 1.10)    | 1.03 (0.99, 1.07)    |
| PM <sub>2.5-10</sub>                                      | 1.00 (0.97, 1.03)        | 1.01 (0.98, 1.05)    | 1.00 (0.96, 1.03)    |
| PM <sub>2.5</sub>                                         | 1.09 (1.05, 1.13)        | 1.10 (1.06, 1.14)    | 1.06 (1.02, 1.10)    |
| <b>Cumulative average exposure, per IQR<sup>d,f</sup></b> |                          |                      |                      |
| PM <sub>10</sub>                                          | 1.05 (1.02, 1.09)        | 1.08 (1.04, 1.12)    | 1.04 (1.00, 1.08)    |
| PM <sub>2.5-10</sub>                                      | 1.02 (0.99, 1.05)        | 1.04 (1.01, 1.09)    | 1.01 (0.97, 1.05)    |
| PM <sub>2.5</sub>                                         | 1.10 (1.06, 1.14)        | 1.10 (1.06, 1.15)    | 1.06 (1.02, 1.10)    |

<sup>a</sup> Hazard ratios greater than 1 indicate that the exposure is associated with earlier age at menarche and HRs less than 1 indicate an association with later age at menarche.

<sup>b</sup> Adjusted for neighborhood SES, region of residence, race, ethnicity, maternal age at menarche, and birthweight.

<sup>c</sup> Adjusted for all covariates in model 1 plus year of birth.

<sup>d</sup> Hazard ratios are per increase in IQR. For PM<sub>2.5</sub> the IQR is 4 µg/m<sup>3</sup>, for PM<sub>2.5-10</sub> the IQR is 5 µg/m<sup>3</sup>, and for PM<sub>10</sub> the IQR is 7 µg/m<sup>3</sup>.

<sup>e</sup> The in-utero models exclude individuals who were missing PM during in-utero or at birth (n=295).

**Table S3.** Hazard ratios (HRs) and 95% confidence intervals (Cis) for the association between residential ambient PM<sub>2.5</sub> exposure and age at menarche using restricted cubic splines in the Growing Up Today Study 2, 1988-2008 (n=5,201).

|                           | <b>In utero</b>                                |                                  | <b>1-Year</b>                                  |                                  | <b>2-Year</b>                                  |                                  | <b>Cumulative</b>                              |                                  |
|---------------------------|------------------------------------------------|----------------------------------|------------------------------------------------|----------------------------------|------------------------------------------------|----------------------------------|------------------------------------------------|----------------------------------|
| <b>Spline<sup>a</sup></b> | <b>PM<sub>2.5</sub><br/>(µg/m<sup>3</sup>)</b> | <b>HR (95% CI)<sup>b,c</sup></b> |
| <b>Knot 1</b>             | 11.5                                           | 1.00 (0.91, 1.11)                | 8.8                                            | 0.89 (0.81, 0.98)                | 8.9                                            | 0.84 (0.76, 0.93)                | 10.2                                           | 0.95 (0.86, 1.04)                |
| <b>Knot 2</b>             | 16.0                                           | 1.00 (1.00, 1.00)                | 12.1                                           | 1.00 (1.00, 1.00)                | 12.2                                           | 1.00 (1.00, 1.00)                | 13.4                                           | 1.00 (1.00, 1.00)                |
| <b>Knot 3</b>             | 20.5                                           | 1.07 (0.97, 1.18)                | 15.3                                           | 1.28 (1.16, 1.41)                | 15.4                                           | 1.34 (1.22, 1.47)                | 16.6                                           | 1.21 (1.10, 1.33)                |

<sup>a</sup> Knots for restricted cubic spline model

<sup>b</sup> Hazard ratios greater than 1 indicate that the exposure is associated with earlier age at menarche and HRs less than 1 indicate an association with later age at menarche.

<sup>c</sup> Adjusted for neighborhood SES, region of residence, race, ethnicity, maternal age at menarche, birthweight and year of birth.

**Table S4.** Predicted survival time for girls in the Growing Up Today Study 2 (n=5,201) exposed to the 10<sup>th</sup> and 90<sup>th</sup> percentile for the cumulative average PM exposure from 1988 to 2008 using Cox proportional hazard model.

|                      |                  | Age  |      |      |      |      |      |      |      |      |      |
|----------------------|------------------|------|------|------|------|------|------|------|------|------|------|
| Exposure             |                  | 8    | 9    | 10   | 11   | 12   | 13   | 14   | 15   | 16   | 17   |
| PM <sub>2.5</sub>    | 10 <sup>th</sup> | 1.00 | 0.99 | 0.95 | 0.77 | 0.50 | 0.27 | 0.15 | 0.11 | 0.10 | 0.10 |
|                      | 90 <sup>th</sup> | 1.00 | 0.99 | 0.94 | 0.75 | 0.46 | 0.23 | 0.12 | 0.08 | 0.08 | 0.08 |
| PM <sub>2.5-10</sub> | 10 <sup>th</sup> | 1.00 | 0.99 | 0.95 | 0.76 | 0.49 | 0.26 | 0.15 | 0.10 | 0.10 | 0.09 |
|                      | 90 <sup>th</sup> | 1.00 | 0.99 | 0.95 | 0.76 | 0.48 | 0.25 | 0.14 | 0.10 | 0.09 | 0.09 |
| PM <sub>10</sub>     | 10 <sup>th</sup> | 1.00 | 0.99 | 0.95 | 0.76 | 0.49 | 0.26 | 0.15 | 0.10 | 0.10 | 0.10 |
|                      | 90 <sup>th</sup> | 1.00 | 0.99 | 0.94 | 0.75 | 0.47 | 0.24 | 0.13 | 0.09 | 0.08 | 0.08 |

Predicted survival curves are modeled from adjusted Cox proportional hazard models using the mean value of continuous covariates and most common level for categorical covariates. These specific curves were estimated for a White, non-Hispanic girls living in the Northeast region in a neighborhood with the lowest socioeconomic status, who had a birthweight between 2500 to 4000 grams, whose mother had an age of menarche between 12 and 15 years, and who was born between 1989 and 1990. The solid red line is the predicted survival curve for the 90<sup>th</sup> percentile for cumulative average PM exposure (PM<sub>2.5</sub>: 17.9 µg/m<sup>3</sup>; PM<sub>2.5-10</sub>: 14.9 µg/m<sup>3</sup>; PM<sub>10</sub>: 30.5 µg/m<sup>3</sup>). The dashed blue line is the predicted survival curve for the 10<sup>th</sup> percentile for the cumulative average PM exposure (PM<sub>2.5</sub>: 10.7 µg/m<sup>3</sup>; PM<sub>2.5-10</sub>: 5.2 µg/m<sup>3</sup>; PM<sub>10</sub>: 17.4 µg/m<sup>3</sup>).

**Table S5.** Predicted survival time for girls in the Growing Up Today Study 2 (n=4,906) exposed to the 10<sup>th</sup> and 90<sup>th</sup> percentile for the in utero PM average from 1988 to 2008 using Cox proportional hazard model.

|                      |                  | Age  |      |      |      |      |      |      |      |      |      |
|----------------------|------------------|------|------|------|------|------|------|------|------|------|------|
| Exposure             |                  | 8    | 9    | 10   | 11   | 12   | 13   | 14   | 15   | 16   | 17   |
| PM <sub>2.5</sub>    | 10 <sup>th</sup> | 1.00 | 0.99 | 0.95 | 0.77 | 0.50 | 0.27 | 0.16 | 0.11 | 0.11 | 0.10 |
|                      | 90 <sup>th</sup> | 1.00 | 1.00 | 0.94 | 0.75 | 0.47 | 0.24 | 0.14 | 0.09 | 0.09 | 0.09 |
| PM <sub>2.5-10</sub> | 10 <sup>th</sup> | 1.00 | 0.99 | 0.95 | 0.76 | 0.48 | 0.26 | 0.15 | 0.10 | 0.10 | 0.10 |
|                      | 90 <sup>th</sup> | 1.00 | 0.99 | 0.94 | 0.75 | 0.48 | 0.25 | 0.14 | 0.10 | 0.09 | 0.09 |
| PM <sub>10</sub>     | 10 <sup>th</sup> | 1.00 | 0.99 | 0.95 | 0.76 | 0.49 | 0.26 | 0.15 | 0.11 | 0.10 | 0.10 |
|                      | 90 <sup>th</sup> | 1.00 | 0.99 | 0.94 | 0.75 | 0.47 | 0.24 | 0.14 | 0.09 | 0.09 | 0.09 |

Predicted survival curves are modeled from adjusted Cox proportional hazard models using the mean value of continuous covariates and most common level for categorical covariates. These specific curves were estimated for a White, non-Hispanic girl living in the Northeast region, in a neighborhood with the lowest socioeconomic status, who had a birthweight between 2500 to 4000 grams, whose mother had an age at menarche between 12 and 15 years, and who was born between 1989 and 1990. The dashed red line is the predicted survival curve for the 90<sup>th</sup> percentile for cumulative average PM exposure (PM<sub>2.5</sub>: 20.3 µg/m<sup>3</sup>; PM<sub>2.5-10</sub>: 18.3 µg/m<sup>3</sup>; PM<sub>10</sub>: 35.4 µg/m<sup>3</sup>). The dotted blue line is the predicted survival curve for the 10<sup>th</sup> percentile for the cumulative average PM exposure (PM<sub>2.5</sub>: 11.6 µg/m<sup>3</sup>; PM<sub>2.5-10</sub>: 6.2 µg/m<sup>3</sup>; PM<sub>10</sub>: 20.1 µg/m<sup>3</sup>). In utero model excluded 297 individuals and childhood models excluded 2 individuals with missing exposure information.

**Table S6.** Predicted survival time for girls in the Growing Up Today Study 2 (n=5,201) exposed to the 10<sup>th</sup> and 90<sup>th</sup> percentile for the 1-year PM average from 1988 to 2008 using Cox proportional hazard model.

|                      |                  | Age  |      |      |      |      |      |      |      |      |      |
|----------------------|------------------|------|------|------|------|------|------|------|------|------|------|
| Exposure             |                  | 8    | 9    | 10   | 11   | 12   | 13   | 14   | 15   | 16   | 17   |
| PM <sub>2.5</sub>    | 10 <sup>th</sup> | 1.00 | 0.99 | 0.95 | 0.77 | 0.49 | 0.26 | 0.15 | 0.10 | 0.10 | 0.10 |
|                      | 90 <sup>th</sup> | 1.00 | 0.99 | 0.94 | 0.74 | 0.45 | 0.23 | 0.12 | 0.08 | 0.08 | 0.07 |
| PM <sub>2.5-10</sub> | 10 <sup>th</sup> | 1.00 | 0.99 | 0.95 | 0.76 | 0.48 | 0.26 | 0.15 | 0.10 | 0.09 | 0.09 |
|                      | 90 <sup>th</sup> | 1.00 | 0.99 | 0.95 | 0.77 | 0.49 | 0.26 | 0.15 | 0.10 | 0.10 | 0.10 |
| PM <sub>10</sub>     | 10 <sup>th</sup> | 1.00 | 0.99 | 0.95 | 0.76 | 0.49 | 0.26 | 0.15 | 0.10 | 0.10 | 0.09 |
|                      | 90 <sup>th</sup> | 1.00 | 0.99 | 0.94 | 0.75 | 0.47 | 0.24 | 0.13 | 0.09 | 0.09 | 0.08 |

Predicted survival curves are modeled from adjusted Cox proportional hazard models using the mean value of continuous covariates and most common level for categorical covariates. These specific curves were estimated for a White, non-Hispanic girl living in the Northeast region, in a neighborhood with the lowest socioeconomic status, who had a birthweight between 2500 to 4000 grams, whose mother had an age at menarche between 12 and 15 years, and who was born between 1989 and 1990. The dashed red line is the predicted survival curve for the 90<sup>th</sup> percentile for cumulative average PM exposure (PM<sub>2.5</sub>: 17.7 µg/m<sup>3</sup>; PM<sub>2.5-10</sub>: 14.2 µg/m<sup>3</sup>; PM<sub>10</sub>: 30.0 µg/m<sup>3</sup>). The dotted blue line is the predicted survival curve for the 10<sup>th</sup> percentile for the cumulative average PM exposure (PM<sub>2.5</sub>: 9.8 µg/m<sup>3</sup>; PM<sub>2.5-10</sub>: 4.1 µg/m<sup>3</sup>; PM<sub>10</sub>: 15.5 µg/m<sup>3</sup>). In utero model excluded 297 individuals and childhood models excluded 2 individuals with missing exposure information.



**Table S7.** Predicted survival time for girls in the Growing Up Today Study 2 (n=5,201) exposed to the 10<sup>th</sup> and 90<sup>th</sup> percentile for the 2-year PM average from 1988 to 2008 using Cox proportional hazard model.

|                      |                  | Age  |      |      |      |      |      |      |      |      |      |
|----------------------|------------------|------|------|------|------|------|------|------|------|------|------|
| Exposure             |                  | 8    | 9    | 10   | 11   | 12   | 13   | 14   | 15   | 16   | 17   |
| PM <sub>2.5</sub>    | 10 <sup>th</sup> | 1.00 | 0.99 | 0.95 | 0.77 | 0.49 | 0.26 | 0.15 | 0.10 | 0.10 | 0.10 |
|                      | 90 <sup>th</sup> | 1.00 | 0.99 | 0.94 | 0.74 | 0.45 | 0.23 | 0.12 | 0.08 | 0.08 | 0.07 |
| PM <sub>2.5-10</sub> | 10 <sup>th</sup> | 1.00 | 0.99 | 0.95 | 0.76 | 0.49 | 0.26 | 0.15 | 0.10 | 0.10 | 0.09 |
|                      | 90 <sup>th</sup> | 1.00 | 0.99 | 0.95 | 0.76 | 0.49 | 0.26 | 0.15 | 0.10 | 0.10 | 0.10 |
| PM <sub>10</sub>     | 10 <sup>th</sup> | 1.00 | 0.99 | 0.95 | 0.76 | 0.49 | 0.26 | 0.15 | 0.10 | 0.10 | 0.09 |
|                      | 90 <sup>th</sup> | 1.00 | 0.99 | 0.94 | 0.75 | 0.47 | 0.24 | 0.13 | 0.09 | 0.08 | 0.08 |

Predicted survival curves are modeled from adjusted Cox proportional hazard models using the mean value of continuous covariates and most common level for categorical covariates. These specific curves were estimated for a White, non-Hispanic girl living in the Northeast region, in a neighborhood with the lowest socioeconomic status, who had a birthweight between 2500 to 4000 grams, whose mother had an age at menarche between 12 and 15 years, and who was born between 1989 and 1990. The dashed red line is the predicted survival curve for the 90<sup>th</sup> percentile for cumulative average PM exposure (PM<sub>2.5</sub>: 17.7 µg/m<sup>3</sup>; PM<sub>2.5-10</sub>: 14.4 µg/m<sup>3</sup>; PM<sub>10</sub>: 30.2 µg/m<sup>3</sup>). The dotted blue line is the predicted survival curve for the 10<sup>th</sup> percentile for the cumulative average PM exposure (PM<sub>2.5</sub>: 10.0 µg/m<sup>3</sup>; PM<sub>2.5-10</sub>: 4.3 µg/m<sup>3</sup>; PM<sub>10</sub>: 15.8 µg/m<sup>3</sup>). In utero model excluded 297 individuals and childhood models excluded 2 individuals with missing exposure information.

**Table S8.** Hazard ratios (HRs) and 95% confidence intervals (CIs) for the associations between residential PM<sub>10</sub>, PM<sub>2.5-10</sub>, and PM<sub>2.5</sub> exposures and age at menarche using Cox proportional hazard models in the Growing Up Today Study 2, 1988–2008 who did not move during the study period (n = 1827).

|                                                         | HR (95% CI) <sup>1a</sup> |                       |
|---------------------------------------------------------|---------------------------|-----------------------|
|                                                         | Unadjusted                | Adjusted <sup>b</sup> |
| <b>In utero exposure, per IQR<sup>c,d</sup></b>         |                           |                       |
| PM <sub>10</sub>                                        | 1.01 (0.94, 1.07)         | 1.03 (0.96, 1.11)     |
| PM <sub>2.5-10</sub>                                    | 0.98 (0.92, 1.03)         | 1.02 (0.94, 1.10)     |
| PM <sub>2.5</sub>                                       | 1.07 (1.00, 1.15)         | 1.04 (0.97, 1.12)     |
| <b>1-year average exposure, per IQR<sup>c</sup></b>     |                           |                       |
| PM <sub>10</sub>                                        | 0.97 (0.90, 1.05)         | 1.02 (0.94, 1.11)     |
| PM <sub>2.5-10</sub>                                    | 0.92 (0.86, 0.99)         | 0.95 (0.87, 1.04)     |
| PM <sub>2.5</sub>                                       | 1.11 (1.02, 1.21)         | 1.11 (1.02, 1.21)     |
| <b>2-year average exposure, per IQR<sup>c</sup></b>     |                           |                       |
| PM <sub>10</sub>                                        | 0.98 (0.91, 1.07)         | 1.04 (0.95, 1.13)     |
| PM <sub>2.5-10</sub>                                    | 0.94 (0.87, 1.01)         | 0.98 (0.90, 1.06)     |
| PM <sub>2.5</sub>                                       | 1.12 (1.02, 1.22)         | 1.12 (1.02, 1.22)     |
| <b>Cumulative average exposure, per IQR<sup>c</sup></b> |                           |                       |
| PM <sub>10</sub>                                        | 1.00 (0.93, 1.08)         | 1.05 (0.97, 1.14)     |
| PM <sub>2.5-10</sub>                                    | 0.95 (0.89, 1.02)         | 1.00 (0.92, 1.09)     |
| PM <sub>2.5</sub>                                       | 1.12 (1.02, 1.22)         | 1.12 (1.01, 1.21)     |

<sup>a</sup> Hazard ratios greater than 1 indicate that the exposure is associated with earlier age at menarche and HRs less than 1 indicate an association with later age at menarche.

<sup>b</sup> Adjusted for neighborhood SES, median house value, region of residence, race, ethnicity, maternal age at menarche, birthweight, and year of birth.

<sup>c</sup> Hazard ratios are per increase in IQR. For PM<sub>2.5</sub> the IQR is 4 µg/m<sup>3</sup>, for PM<sub>2.5-10</sub> the IQR is 5 µg/m<sup>3</sup>, and for PM<sub>10</sub> the IQR is 7 µg/m<sup>3</sup>.

<sup>d</sup> The in-utero models exclude individuals who were missing PM during in-utero or at birth (n=81).

**Table S9.** Hazard ratios (HRs) and 95% confidence intervals (CIs) for the associations between residential PM<sub>2.5-10</sub>, and PM<sub>2.5</sub> exposures and age at menarche using Cox proportional hazard models in the Growing Up Today Study 2, 1988–2008 (n = 5,201) using multipollutant models.

| Time period          | In utero <sup>a</sup><br>HR (95% CI) <sup>b,c</sup> |                       | 1-Year lag<br>HR (95% CI) <sup>b,c</sup> |                       | 2-Year lag<br>HR (95% CI) <sup>b,c</sup> |                       | Cumulative<br>HR (95% CI) <sup>b,c</sup> |                       |
|----------------------|-----------------------------------------------------|-----------------------|------------------------------------------|-----------------------|------------------------------------------|-----------------------|------------------------------------------|-----------------------|
|                      | Unadjusted                                          | Adjusted <sup>d</sup> | Unadjusted                               | Adjusted <sup>d</sup> | Unadjusted                               | Adjusted <sup>d</sup> | Unadjusted                               | Adjusted <sup>d</sup> |
| Exposure             |                                                     |                       |                                          |                       |                                          |                       |                                          |                       |
| PM <sub>2.5-10</sub> | 1.00 (0.97, 1.02)                                   | 1.00 (0.97, 1.03)     | 0.98 (0.95, 1.01)                        | 0.98 (0.94, 1.01)     | 0.98 (0.95, 1.02)                        | 0.98 (0.95, 1.02)     | 1.00 (0.97, 1.03)                        | 0.99 (0.95, 1.03)     |
| PM <sub>2.5</sub>    | 1.08 (1.05, 1.11)                                   | 1.03 (1.00, 1.07)     | 1.09 (1.05, 1.13)                        | 1.06 (1.02, 1.10)     | 1.09 (1.05, 1.14)                        | 1.06 (1.02, 1.10)     | 1.10 (1.06, 1.14)                        | 1.07 (1.03, 1.11)     |
|                      |                                                     |                       |                                          |                       |                                          |                       |                                          |                       |

<sup>a</sup> The in-utero models exclude individuals who were missing PM during in-utero or at birth (n=295).

<sup>b</sup> Hazard ratios greater than 1 indicate that the exposure is associated with earlier age at menarche and HRs less than 1 indicate an association with later age at menarche.

<sup>c</sup> Hazard ratios are per increase in IQR. For PM<sub>2.5</sub> the IQR is 4 µg/m<sup>3</sup> and for PM<sub>2.5-10</sub> the IQR is 5 µg/m<sup>3</sup>.

<sup>d</sup> Adjusted for neighborhood SES, region of residence, race, ethnicity, maternal age at menarche, birthweight, year of birth, and size fraction (PM<sub>2.5</sub>, PM<sub>2.5-10</sub>).

**Table S10.** Hazard ratios (HRs) and 95% confidence intervals (CIs) for the associations between 1-year average residential PM<sub>10</sub>, PM<sub>2.5-10</sub>, and PM<sub>2.5</sub> exposures and age at menarche in the Growing Up Today Study 2, 1988–1995 (n = 5,201) further adjusting for cumulative average exposures.

| Exposure                         | Adjusted HR (95% CI) further accounting for cumulative average <sup>a,b,c</sup> |                      |                   |
|----------------------------------|---------------------------------------------------------------------------------|----------------------|-------------------|
|                                  | PM <sub>2.5</sub>                                                               | PM <sub>2.5-10</sub> | PM <sub>10</sub>  |
| 1-year average exposure, per IQR | 1.01 (0.96, 1.06)                                                               | 0.99 (0.95, 1.04)    | 1.00 (0.96, 1.04) |

<sup>a</sup> Hazard ratios greater than 1 indicate that the exposure is associated with earlier age at menarche and HRs less than 1 indicate an association with later age at menarche.

<sup>b</sup> Hazard ratios are per increase in IQR. For PM<sub>2.5</sub> the IQR is 4 µg/m<sup>3</sup>, for PM<sub>2.5-10</sub> the IQR is 5 µg/m<sup>3</sup>, and for PM<sub>10</sub> the IQR is 7 µg/m<sup>3</sup>.

<sup>c</sup> Adjusted for neighborhood SES, region of residence, race, ethnicity, maternal age at menarche, birthweight, year of birth, and cumulative average exposure.

**Figure S1.** Overview of exclusion criteria applied to the Growing Up Today Study 2 participants from 1988 to 2008

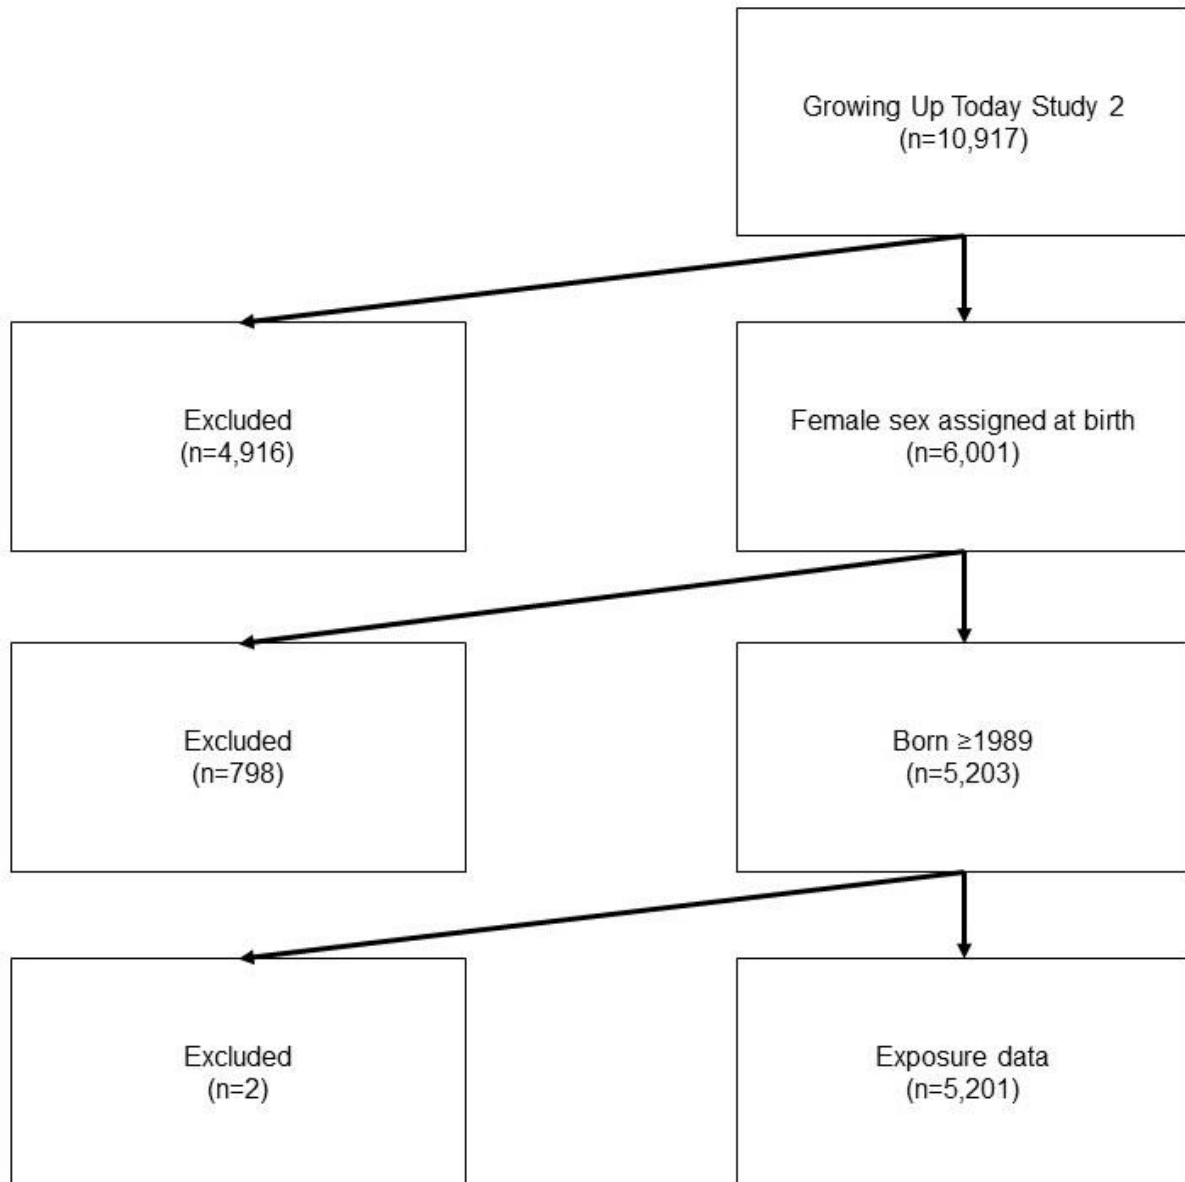

**Figure S2.** Restricted cubic spline models to test the non-linear association between PM<sub>2.5</sub> and age at menarche in the Growing Up Today Study 2, 1988–2008 (n=5,201) (see Table S3).

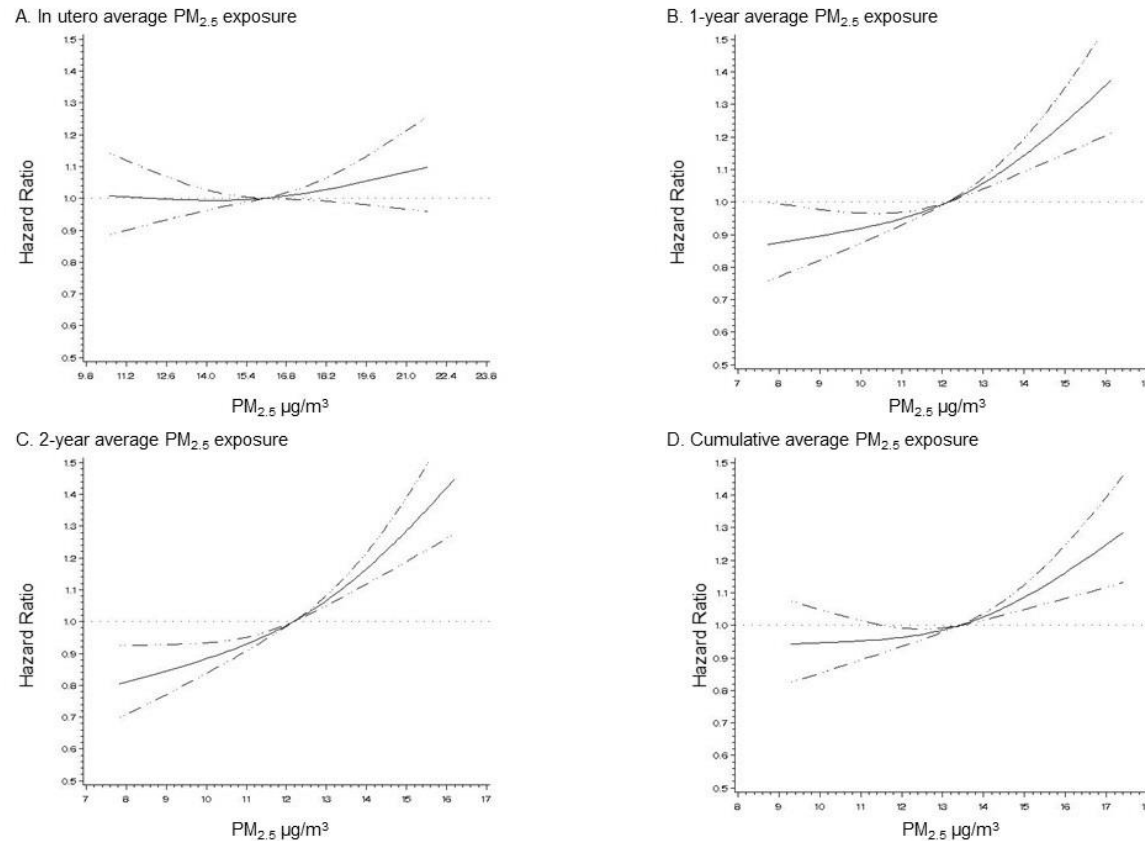

**Caption.** Restricted cubic splines were adjusted for race, ethnicity, region of residence, birth weight, maternal age at menarche, neighborhood socioeconomic status, and year of birth. The p-value for non-linearity were 0.40 for in utero, 0.09 for 1-year average, 0.14 for 2-year average, and 0.09 for cumulative PM<sub>2.5</sub> exposure. P-values represent the test for curvature with smaller p-values indicating likelihood of a non-linear association between PM exposure and age at menarche. In utero model excluded 295 individuals with missing exposure information.

**Figure S3.** Predicted survival time for girls in the Growing Up Today Study 2 (n=5,201) exposed to the 10<sup>th</sup> and 90<sup>th</sup> percentile for the in utero PM average from 1988 to 2008 using Cox proportional hazard model (see Table S5).

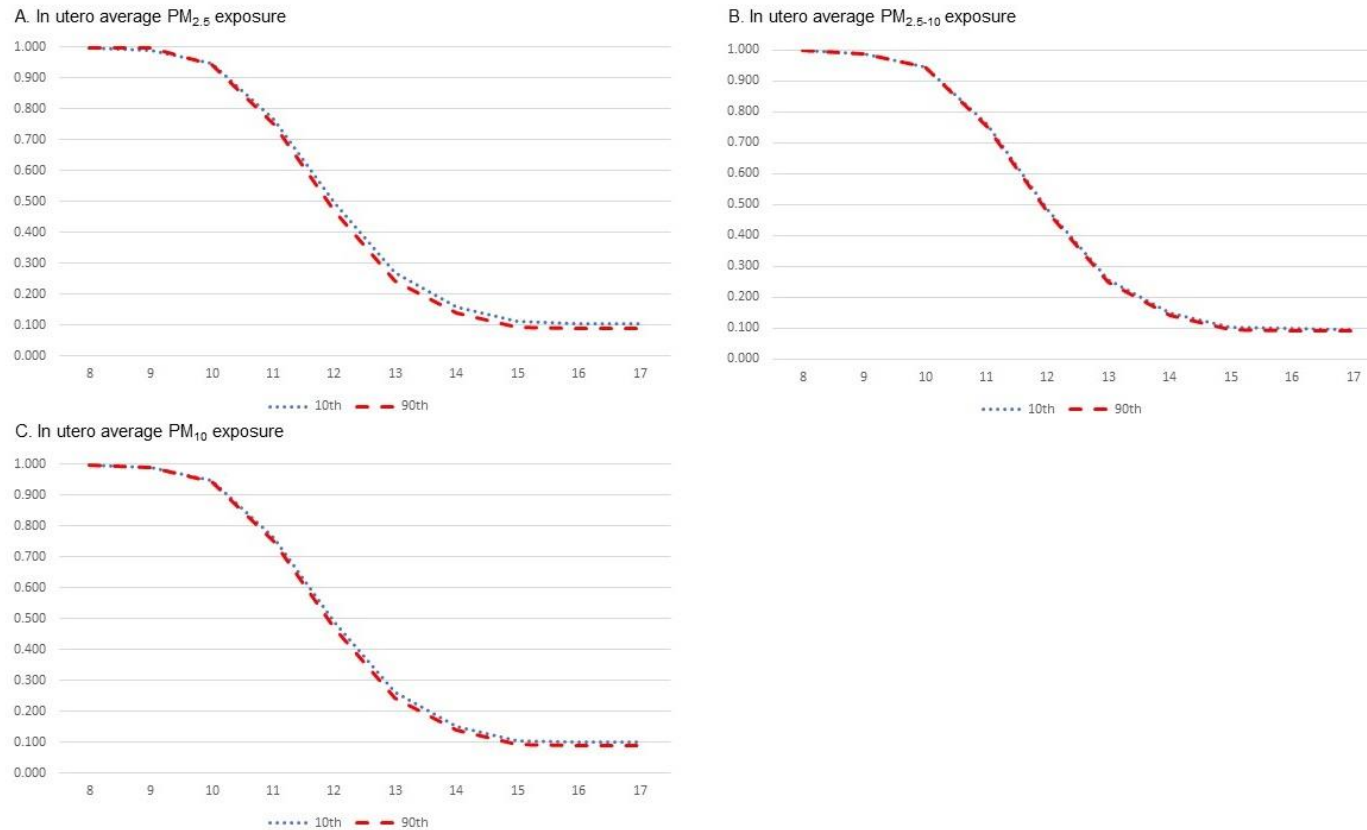

**Caption.** Predicted survival curves are modeled from adjusted Cox proportional hazard models using the mean value of continuous covariates and most common level for categorical covariates. These specific curves were estimated for a White, non-Hispanic girl living in the Northeast region, in a neighborhood with the lowest socioeconomic status, who had a birthweight between 2500 to 4000 grams, whose mother had an age at menarche between 12 and 15 years, and who was born between 1989 and 1990. The dashed red line is the predicted survival curve for the 90<sup>th</sup> percentile for cumulative average PM exposure (PM<sub>2.5</sub>: 20.3 µg/m<sup>3</sup>; PM<sub>2.5-10</sub>: 18.3 µg/m<sup>3</sup>; PM<sub>10</sub>: 35.4 µg/m<sup>3</sup>). The dotted blue line is the predicted survival curve for the 10<sup>th</sup> percentile for the cumulative average PM exposure (PM<sub>2.5</sub>: 11.6 µg/m<sup>3</sup>; PM<sub>2.5-10</sub>: 6.2 µg/m<sup>3</sup>; PM<sub>10</sub>: 20.1 µg/m<sup>3</sup>). In utero model excluded 295 individuals with missing exposure information.

**Figure S4.** Predicted survival time for girls in the Growing Up Today Study 2 (n=5,201) exposed to the 10<sup>th</sup> and 90<sup>th</sup> percentile for the 1-year PM average from 1988 to 2008 using Cox proportional hazard model (see Table S6).

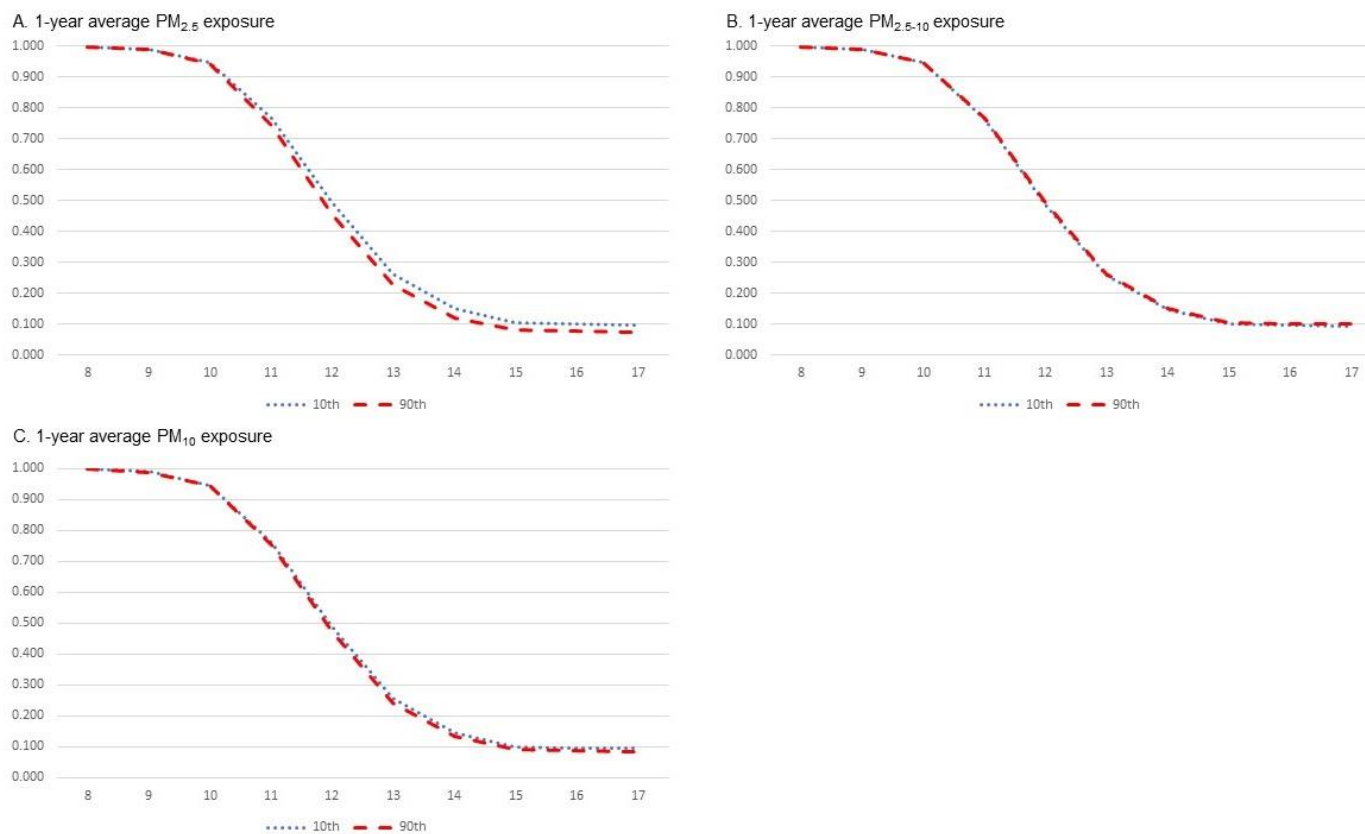

**Caption.** Predicted survival curves are modeled from adjusted Cox proportional hazard models using the mean value of continuous covariates and most common level for categorical covariates. These specific curves were estimated for a White, non-Hispanic girl living in the Northeast region, in a neighborhood with the lowest socioeconomic status, who had a birthweight between 2500 to 4000 grams, whose mother had an age at menarche between 12 and 15 years and who was born between 1989 and 1990. The dashed red line is the predicted survival curve for the 90<sup>th</sup> percentile for cumulative average PM exposure (PM<sub>2.5</sub>: 17.7 µg/m<sup>3</sup>; PM<sub>2.5-10</sub>: 14.2 µg/m<sup>3</sup>; PM<sub>10</sub>: 30.0 µg/m<sup>3</sup>). The dotted blue line is the predicted survival curve for the 10<sup>th</sup> percentile for the cumulative average PM exposure (PM<sub>2.5</sub>: 9.8 µg/m<sup>3</sup>; PM<sub>2.5-10</sub>: 4.1 µg/m<sup>3</sup>; PM<sub>10</sub>: 15.5 µg/m<sup>3</sup>). For PM<sub>2.5-10</sub> the 10<sup>th</sup> and 90<sup>th</sup> percentiles are almost indistinguishable. In utero model excluded 295 individuals with missing exposure information.



**Figure S5.** Predicted survival time for girls in the Growing Up Today Study 2 (n=5,201) exposed to the 10<sup>th</sup> and 90<sup>th</sup> percentile for the 2-year PM average from 1988 to 2008 using Cox proportional hazard model (see Table S7).

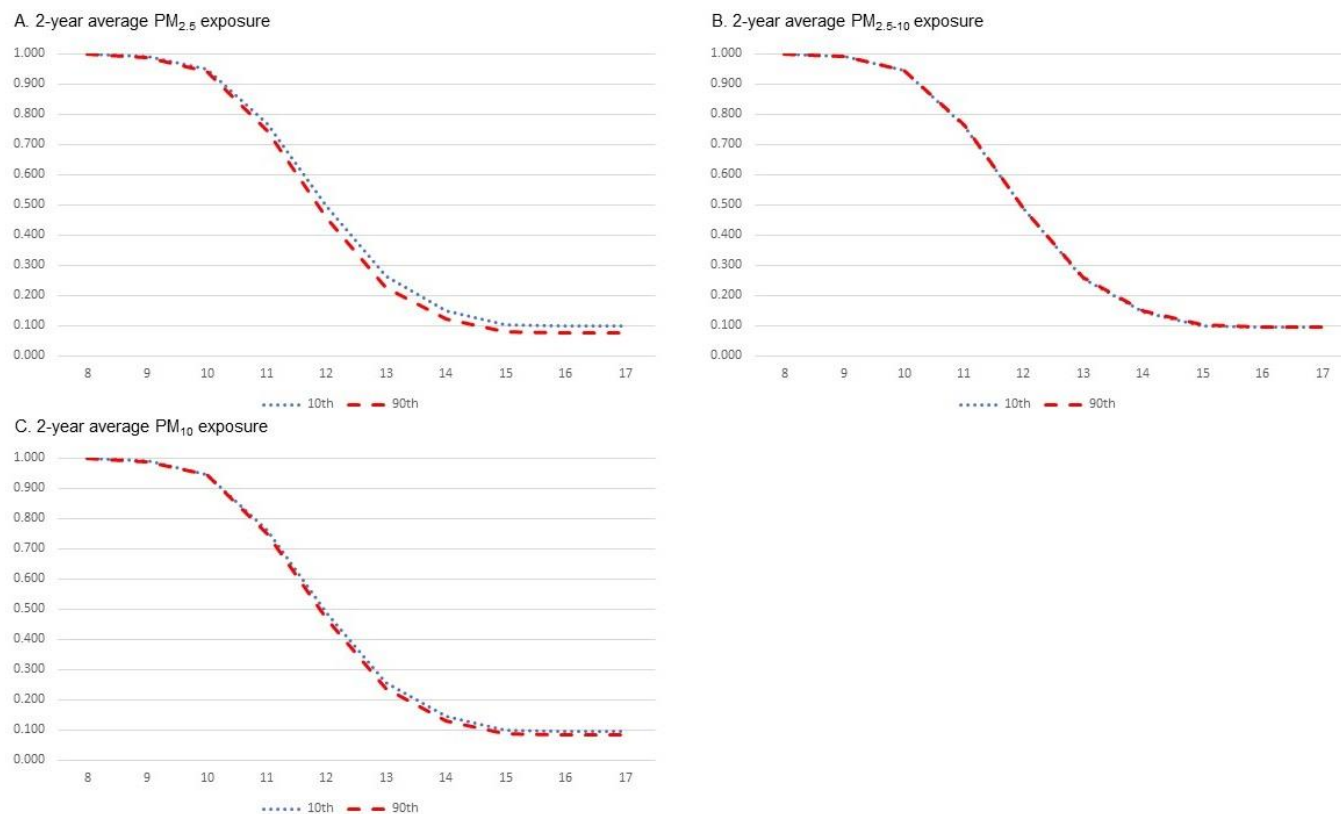

**Caption.** Predicted survival curves are modeled from adjusted Cox proportional hazard models using the mean value of continuous covariates and most common level for categorical covariates. These specific curves were estimated for a White, non-Hispanic girl living in the Northeast region, in a neighborhood with the lowest socioeconomic status, who had a birthweight between 2500 to 4000 grams, whose mother had an age at menarche between 12 and 15 years, and who was born between 1989 and 1990. The dashed red line is the predicted survival curve for the 90<sup>th</sup> percentile for cumulative average PM exposure (PM<sub>2.5</sub>: 17.7  $\mu\text{g}/\text{m}^3$ ; PM<sub>2.5-10</sub>: 14.4  $\mu\text{g}/\text{m}^3$ ; PM<sub>10</sub>: 30.2  $\mu\text{g}/\text{m}^3$ ). The dotted blue line is the predicted survival curve for the 10<sup>th</sup> percentile for the cumulative average PM exposure (PM<sub>2.5</sub>: 10.0  $\mu\text{g}/\text{m}^3$ ; PM<sub>2.5-10</sub>: 4.3  $\mu\text{g}/\text{m}^3$ ; PM<sub>10</sub>: 15.8  $\mu\text{g}/\text{m}^3$ ). In utero model excluded 295 individuals with missing exposure information.
