# Supplementary material
Source: PubMed Central journal article supplement (PMC10549984)
Supplement: ehp12110.smcontents.508.pdf [file ehp12110.smcontents.508.pdf]

**Note to readers with disabilities:** *EHP* strives to ensure that all journal content is accessible to all readers. However, some figures and Supplemental Material published in *EHP* articles may not conform to [508 standards](#) due to the complexity of the information being presented. If you need assistance accessing journal content, please contact [ehp508@niehs.nih.gov](mailto:ehp508@niehs.nih.gov). Our staff will work with you to assess and meet your accessibility needs within 3 working days.

### **Supplemental Material**

#### **Exposure to Particulate Matter Air Pollution and Age of Menarche in a Nationwide Cohort of U.S. Girls**

Robert B. Hood, Jaime E. Hart, Francine Laden, Bernard Rosner, Jorge E. Chavarro, and Audrey J. Gaskins

#### **Table of Contents**

**Table S1.** Pearson correlations between particulate matter (PM) exposures among 5,201 girls in the Growing Up Today Study from 1989 to 2008.

**Table S2.** Hazard ratios (HRs) and 95% confidence intervals (CIs) for the associations between residential ambient PM<sub>10</sub>, PM<sub>2.5-10</sub>, and PM<sub>2.5</sub> exposures and age at menarche using Cox proportional hazard models in the Growing Up Today Study 2, 1988–2008 (n = 5,201).

**Table S3.** Hazard ratios (HRs) and 95% confidence intervals (Cis) for the association between residential ambient PM<sub>2.5</sub> exposure and age at menarche using restricted cubic splines in the Growing Up Today Study 2, 1988-2008 (n=5,201).

**Table S4.** Predicted survival time for girls in the Growing Up Today Study 2 (n=5,201) exposed to the 10<sup>th</sup> and 90<sup>th</sup> percentile for the cumulative average PM exposure from 1988 to 2008 using Cox proportional hazard model.

**Table S5.** Predicted survival time for girls in the Growing Up Today Study 2 (n=4,906) exposed to the 10<sup>th</sup> and 90<sup>th</sup> percentile for the in utero PM average from 1988 to 2008 using Cox proportional hazard model.

**Table S6.** Predicted survival time for girls in the Growing Up Today Study 2 (n=5,201) exposed to the 10<sup>th</sup> and 90<sup>th</sup> percentile for the 1-year PM average from 1988 to 2008 using Cox proportional hazard model.

**Table S7.** Predicted survival time for girls in the Growing Up Today Study 2 (n=5,201) exposed to the 10<sup>th</sup> and 90<sup>th</sup> percentile for the 2-year PM average from 1988 to 2008 using Cox proportional hazard model.

**Table S8.** Hazard ratios (HRs) and 95% confidence intervals (CIs) for the associations between residential PM<sub>10</sub>, PM<sub>2.5-10</sub>, and PM<sub>2.5</sub> exposures and age at menarche using Cox proportional hazard models in the Growing Up Today Study 2, 1988–2008 who did not move during the study period (n = 1827).

**Table S9.** Hazard ratios (HRs) and 95% confidence intervals (CIs) for the associations between residential PM<sub>2.5-10</sub>, and PM<sub>2.5</sub> exposures and age at menarche using Cox proportional hazard models in the Growing Up Today Study 2, 1988–2008 (n = 5,201) using multipollutant models.

**Table S10.** Hazard ratios (HRs) and 95% confidence intervals (CIs) for the associations between 1-year average residential PM<sub>10</sub>, PM<sub>2.5-10</sub>, and PM<sub>2.5</sub> exposures and age at menarche in the Growing Up Today Study 2, 1988–1995 (n = 5,201) further adjusting for cumulative average exposures.

**Figure S1.** Overview of exclusion criteria applied to the Growing Up Today Study 2 participants from 1988 to 2008.

**Figure S2.** Restricted cubic spline models to test the non-linear association between PM<sub>2.5</sub> and age at menarche in the Growing Up Today Study 2, 1988–2008 (n=5,201) (see Table S3).

**Figure S3.** Predicted survival time for girls in the Growing Up Today Study 2 (n=5,201) exposed to the 10<sup>th</sup> and 90<sup>th</sup> percentile for the in utero PM average from 1988 to 2008 using Cox proportional hazard model (see Table S5).

**Figure S4.** Predicted survival time for girls in the Growing Up Today Study 2 (n=5,201) exposed to the 10<sup>th</sup> and 90<sup>th</sup> percentile for the 1-year PM average from 1988 to 2008 using Cox proportional hazard model (see Table S6).

**Figure S5.** Predicted survival time for girls in the Growing Up Today Study 2 (n=5,201) exposed to the 10<sup>th</sup> and 90<sup>th</sup> percentile for the 2-year PM average from 1988 to 2008 using Cox proportional hazard model (see Table S7).
